# Supplementary material for: Staurosporine augments EGF-mediated EMT in PMC42-LA cells through actin depolymerisation, focal contact size reduction and Snail1 induction – A model for cross-modulation
Source: BMC Cancer. 2009 Jul 15;9:235. doi: 10.1186/1471-2407-9-235 (PMC2717979; doi:10.1186/1471-2407-9-235)
Supplement: Additional file 1 — Amplicon sequences for genes analysed using MT-PCR. The sequences provided represent the individual gene fragments amplified by MT-PCR. [file 1471-2407-9-235-S1.xls]

## Sheet: Sheet1
Gene name	Amplicon sequence
AKT1	AAGAAGGACCCCAAGCAGAGGCTTGGCGGGGGCTCACCGAGGACGCCAAGGAGATCATGCAGCATCGCTTCTTTGCCGGTATCGT
CAV1	CGACCCTAAACACCTCAACGATGACGTGGTCAAGATTGACTTTGAAGATGTCGATTGCAGAACCAGAAGGG
CD24	ATCCAAGCATCCTGAGCAACTCTTGATTATCCATATTGAGTCAAATGGTAGGCATTTCCTATCACCTGTTTCCATTCAACAAGAGCAC
CD44	CCCAGATGGAGAAAGCTCTGAGCATCGGATTTGAGACCTGCAGGTATGGGTTCATAGAAGGGCACGTGGTGATT
CDH5	CCAATCCATGCTCTCTTTCTTTTCTCTGTCTACTCCTTATCCCTTGGTTTAGAGGAACCCAAGATGTGGCCTTTAGCAAAACTGGAC
CLDN1	CCCTATGACCCCAGTCAATGCCAGGTACGAATTTGGTCAGGCTCTCTTCAACTGGCTGGGCTGCTGCTTCTCTCTGCCT
CLDN4	GGAGGGCCTATGGATGAACTGCGTGGTGACAGAGCACCGGCCAGATGCAGTGCAAGGTGTACGACTCGCTGC
COL1A2	GAAAACATCCCAGCCAAGAACTGGTATAGGAGCTCCAAGGACAAGAAACACGTCTGGCTAGGAGAAACTATCAATGCTGGCAGCC
CTGF	GCAGGCTAGAGAAGCAGAGCCGCCTGTGCATGGTCAGGCCTTGCGAAGCTGACCTGGAAGAGAACATTAAGAAGGGCAAAAAGTGCATCCGTACTCCCAAAATCTCCA
CYR61	ACCGCTCTGAAGGGGATCTGCAGAGCTCAGTCAGAGGGCAGACCCTGTGAATATAACTCCAGAATCTACCAAAACGGGG
DCN	GAGATCACCAAAGTGCGAAAAGTTACTTTCAATGGACTGAACCAGATGATTGTCATAGAACTGGGCACCA
EGFR	CAGTTGGGCACTTTTGAAGATCATTTTCTCAGCCTCCAGAGGATGTTCAATAACTGTGAGGTGGTCCTTGGGAA
EPHB4	TCATTGTGGTCGCAGTTCTCTGCCTCAGGAAGCAGAGCAATGGGAGAGAAGCAGAATATTCGGACAAACACGGACA
GUSB (housekeeping gene)	CCATTATTCAGAGCGAGTATGGAGCAGAAACGATTGCAGGGTTTCACCAGGATCCACCTCTGATGTTCACTGAAGAGTACC
KRT14	GCTGAGATCAAAGACTACAGTCCCTACTTCAAGACCATTGAGGACCTGAGGAACAAGATTCTCACAGCCACAGTGGACAA
KRT18	GGATAGTGGATGGCAAAGTGGTGTCTGAGACCAATGACACCAAAGTTCTGAGGCATTAAGCCAGCAGAAGCAGGGTA
KRT7	CTTCCTCAGGACCCTCAATGACGACGGAGTTGACAGAGCTGCAGTCCCAGATCTCCGACACATCTGTGGT
KRT8	CAGGAGAAGGAGCAGATCAAGACCCTCAACAACAAGTTTGCCTCCTTCATAGACAAGGTACGGTTCCTGGAG
LGALS1	GGTGGAGTCCTTCTGACAGCTGGTGCGCCTGCCCGGGAACATCCTCCTGGACTCAATCATGGCTTGTGGTCTGGT
NLF1	GAGGGCCAAGGAAATATTGACTGATTAGATAGAAGAGCACATGATAGATCTGAACTACTCTNTATGTCATCATTCATTTGGTCAACAACTGCAAGC
NLF2	CCATCCACATTTGTCATCGTCTATTGGTAAAGAAGAAAAAGATAATGACTCCCTGTTCTGTTCACAGGACCCCCATATCTCTTTCCAGACCATTTTTGCATTCCAAGG
NONO (housekeeping gene)	GTGGAGCCCATGGACCAGTTAGATGATGAAGAGGGACTTCCAGAGAAGCTGGTTATAAAAAACCAGCAATTTCACAAGGAACGAG
NONO-L	AAGGTCACAGGCAGCGTACATACGGTTCTGTTATACCCCATATATTACCCCTTCATGTCCTAAAGAAGACAT
PAX2	ACGCCCAAAGTGGTGGACAAGATTGCTGAATACAAACGACAGAACCCGACTATGTTCGCCTGGGAGATTCGAGA
PAX6	AACACCGTCATTTCAAACCATTGTGGTCTTCAAGCAACAACAGCAGCACAAAAAACCCCAACCAAACAAAACTCTTGACAGA
RPL32 (housekeeping gene)	CATGTGATGCTTGTGAGAATTGAGAAAATATGCATGGAAATATCCAGATGAATTTCTTACACAGATTCTTACGGGATGCCTAA
S100A4	GGCAAAGAGGGTGACAAGTTCAAGCTCAACAAGTCAGAACTAAAAGGAGCTGCTGACCCGGGAGCTGCCCAGCTTCTTGGGGAAAAGGACAGATGAAGCTGCTTTCCAGAAGCTGATGA
SPARC	ATCTGTGGGAGCTAATCCTGTCCAGGTGGAAGTAGGAGAATTTGATGATGGTGCAGAGGAAACCGAAGAGGAG
TJP1	AGGAAGGTGATCAAATTCTCAGGGTAAACAACGTAGATTTTACAAATATCATAAGAGAAGAAGCCGTCCTTTTCCTGCTTGAC
WT1	ACTCTCCACTCCTCCTCACTAAAAAGGAAACTTCAGTTGATCTTCTTCATCCAACTTCCAAGACAAGATACCGGTGCTTCT
